# Supplementary material for: Dynamics of Responses in Compatible Potato - Potato virus Y Interaction Are Modulated by Salicylic Acid
Source: PubMed Central journal article supplement (PMC3237580; doi:10.1371/journal.pone.0029009), 2011-12-14
Supplement: pone.0029009.s009.pdf [file pone.0029009.s009.pdf]

**Supplemental table S9.** Dynamics of gene expression: raw data

Relative gene expression of  $\beta$ -1,3-glucanase classes (Glu-I, Glu-II, Glu-III), pathogenesis-related protein1b (PR-1b), chlorophyll a-b binding protein 4 (CAB4), RuBisCO activase (RA) and granule bound starch synthase I (GBSSI) and relative viral RNA concentration (PVY), in inoculated and upper non-inoculated leaves of individual plants of potato genotypes Désirée and NahG-Désirée-Désirée at 3, 4, 5, 7, 8, 9 and 11 days after inoculation (dpi) with PVY or mock inoculation and in non-treated plants before start of experiment (0 dpi).

| Genotype | Inoculum | Leaf type  | dpi | PVY  | PR-1b | Glu-I | Glu-II | Glu-III | RA   | CAB4 | GBSSI |
|----------|----------|------------|-----|------|-------|-------|--------|---------|------|------|-------|
| Désirée  |          | upper      | 0   | 0.00 | 1.00  | 1.00  | 1.00   | 1.00    | 1.00 | 1.00 | 1.00  |
| Désirée  |          | upper      | 0   | 0.00 | 0.26  | 1.52  | 0.32   | 0.33    | 1.09 | 0.72 | 0.73  |
| Désirée  |          | upper      | 0   | 0.00 | 0.44  | 0.43  | 0.81   | 0.67    | 1.39 | 1.68 | 2.24  |
| Désirée  |          | upper      | 0   | 0.00 | 0.05  | NA    | 0.30   | 0.13    | 1.66 | 1.97 | 2.76  |
| Désirée  |          | upper      | 0   | 0.00 | 0.12  | 1.21  | 0.53   | 0.58    | 1.72 | 2.14 | 2.83  |
| Désirée  |          | upper      | 0   | 0.00 | 0.04  | 0.11  | 0.14   | 0.06    | 1.65 | 2.21 | 1.97  |
| Désirée  | MOCK     | inoculated | 1   | 0.00 | NA    | 1.05  | 1.34   | 1.60    | 0.68 | 0.29 | 1.65  |
| Désirée  | MOCK     | inoculated | 1   | 0.00 | 0.69  | 0.27  | 0.76   | 0.55    | 1.03 | 0.59 | 1.77  |
| Désirée  | MOCK     | inoculated | 1   | 0.00 | 0.11  | 0.29  | 0.19   | 0.19    | 0.64 | 0.78 | 0.48  |
| Désirée  | MOCK     | inoculated | 3   | 0.00 | 2.11  | 0.82  | 0.84   | 1.10    | 0.82 | 0.82 | 1.22  |
| Désirée  | MOCK     | inoculated | 3   | 0.00 | 0.29  | 0.38  | 0.17   | 0.19    | 0.81 | 0.63 | 0.97  |
| Désirée  | MOCK     | inoculated | 3   | 0.00 | 1.76  | 0.97  | 1.51   | 1.45    | 0.83 | 0.99 | 1.04  |
| Désirée  | MOCK     | inoculated | 4   | 0.00 | 0.09  | 0.06  | 0.38   | 0.19    | 0.66 | 0.81 | 1.35  |
| Désirée  | MOCK     | inoculated | 4   | 0.00 | 0.02  | 0.02  | 0.25   | 0.06    | 1.23 | 1.58 | 1.43  |
| Désirée  | MOCK     | inoculated | 4   | 0.00 | 0.04  | 0.04  | 0.16   | 0.04    | 0.83 | 0.91 | 0.90  |
| Désirée  | MOCK     | inoculated | 5   | 0.00 | 0.55  | 0.27  | 0.86   | 0.35    | 1.13 | 0.93 | 1.60  |
| Désirée  | MOCK     | inoculated | 5   | 0.00 | 0.04  | 0.01  | 0.40   | 0.10    | 0.69 | 0.81 | 3.86  |
| Désirée  | MOCK     | inoculated | 5   | 0.00 | 1.38  | 0.33  | 1.55   | 0.66    | 0.89 | 0.88 | 1.04  |
| Désirée  | MOCK     | inoculated | 7   | 0.00 | 0.09  | 0.67  | 0.19   | 0.14    | 0.41 | 0.33 | 0.53  |
| Désirée  | MOCK     | inoculated | 7   | 0.00 | 0.55  | 0.11  | 0.36   | 0.40    | 0.87 | 0.51 | 0.77  |
| Désirée  | MOCK     | inoculated | 7   | 0.00 | 0.88  | 0.10  | 3.94   | 1.74    | 1.68 | 2.27 | 3.32  |
| Désirée  | MOCK     | upper      | 1   | 0.00 | 0.04  | 0.02  | 0.46   | 0.19    | 2.37 | 3.28 | 3.38  |
| Désirée  | MOCK     | upper      | 1   | 0.00 | 0.06  | 0.02  | 0.23   | 0.09    | 2.32 | 3.15 | 3.10  |
| Désirée  | MOCK     | upper      | 1   | 0.00 | 0.02  | 0.02  | 0.05   | 0.02    | 1.75 | 2.10 | 2.36  |
| Désirée  | MOCK     | upper      | 3   | 0.00 | 0.02  | 0.04  | 0.21   | 0.03    | 1.94 | 2.09 | 2.96  |
| Désirée  | MOCK     | upper      | 3   | 0.00 | 0.04  | 0.04  | 0.15   | 0.03    | 1.39 | 1.58 | 1.88  |
| Désirée  | MOCK     | upper      | 3   | 0.00 | 0.04  | 0.04  | 0.12   | 0.03    | 1.80 | 2.20 | 2.65  |
| Désirée  | MOCK     | upper      | 4   | 0.00 | 0.16  | 0.03  | 1.39   | 0.69    | 1.23 | 1.36 | 5.40  |
| Désirée  | MOCK     | upper      | 4   | 0.00 | 0.03  | 0.27  | 0.13   | 0.12    | 0.36 | 0.51 | 0.28  |
| Désirée  | MOCK     | upper      | 4   | 0.00 | 0.03  | 0.02  | 0.13   | 0.03    | 1.74 | 1.68 | 2.31  |
| Désirée  | MOCK     | upper      | 5   | 0.00 | 0.16  | 0.06  | 0.25   | 0.49    | 1.87 | 2.30 | 3.77  |
| Désirée  | MOCK     | upper      | 5   | 0.00 | 0.15  | 0.04  | 0.69   | 0.18    | 0.81 | 0.96 | 3.12  |
| Désirée  | MOCK     | upper      | 5   | 0.00 | 0.06  | 0.03  | 0.43   | 0.07    | 1.17 | 0.88 | 3.18  |
| Désirée  | MOCK     | upper      | 7   | 0.00 | 0.29  | 0.08  | 0.18   | 0.07    | 0.92 | 1.06 | 0.62  |
| Désirée  | MOCK     | upper      | 7   | 0.00 | 0.17  | 0.42  | 0.23   | 0.11    | 0.78 | 0.88 | 0.59  |
| Désirée  | MOCK     | upper      | 7   | 0.00 | 0.05  | 0.06  | 0.28   | 0.06    | 0.97 | 1.23 | 1.03  |
| Désirée  | MOCK     | upper      | 8   | 0.00 | 0.62  | 0.10  | 1.40   | 0.80    | 0.58 | 0.74 | 3.38  |
| Désirée  | MOCK     | upper      | 8   | 0.00 | 0.70  | 0.24  | 0.86   | 0.45    | 0.54 | 0.58 | 6.06  |
| Désirée  | MOCK     | upper      | 8   | 0.00 | 0.15  | 0.24  | 0.36   | 0.18    | 0.47 | 0.77 | 3.67  |
| Désirée  | MOCK     | upper      | 9   | 0.00 | 0.06  | 0.05  | 0.59   | 0.16    | 0.69 | 0.81 | 5.21  |
| Désirée  | MOCK     | upper      | 9   | 0.00 | 2.38  | 0.15  | 2.96   | 1.86    | 0.55 | 0.66 | 5.10  |
| Désirée  | MOCK     | upper      | 9   | 0.00 | 1.02  | 0.18  | 0.89   | 0.34    | 0.40 | 0.54 | 4.19  |
| Désirée  | MOCK     | upper      | 11  | 0.00 | 0.54  | 0.01  | 1.11   | 0.28    | 0.56 | 0.72 | 4.85  |

| Genotype     | Inoculum | Leaf type  | dpi | PVY  | PR-1b | Glu-I | Glu-II | Glu-II | RA   | CAB4 | GBSSI |
|--------------|----------|------------|-----|------|-------|-------|--------|--------|------|------|-------|
| Désirée      | MOCK     | upper      | 11  | 0.00 | 0.74  | 0.03  | 1.49   | 0.41   | 0.40 | 0.70 | 2.87  |
| Désirée      | MOCK     | upper      | 11  | 0.00 | 0.82  | 0.03  | 1.78   | 0.52   | 0.49 | 0.58 | 4.03  |
| Désirée      | PVY      | inoculated | 1   | 1.00 | 0.56  | 1.30  | 0.41   | 0.35   | 0.37 | 0.57 | 1.26  |
| Désirée      | PVY      | inoculated | 1   | 3.75 | 0.33  | 0.91  | 0.45   | 0.34   | 0.76 | 0.85 | 2.40  |
| Désirée      | PVY      | inoculated | 1   | 0.77 | 0.75  | 0.90  | 0.65   | 0.37   | 0.52 | 0.77 | 1.73  |
| Désirée      | PVY      | inoculated | 3   | 0.39 | 0.18  | 0.83  | 0.34   | 0.63   | 0.41 | 0.40 | 0.86  |
| Désirée      | PVY      | inoculated | 3   | 0.20 | 1.84  | 0.64  | 1.21   | 1.06   | 0.58 | 0.73 | 2.21  |
| Désirée      | PVY      | inoculated | 3   | 0.42 | 0.24  | 0.38  | 0.17   | 0.16   | 0.38 | 0.33 | 1.04  |
| Désirée      | PVY      | inoculated | 4   | 0.11 | 0.12  | 0.07  | 0.34   | 0.13   | 0.47 | 1.16 | 3.25  |
| Désirée      | PVY      | inoculated | 4   | 0.29 | 0.12  | 0.44  | 0.19   | 0.14   | 0.42 | 0.72 | 1.63  |
| Désirée      | PVY      | inoculated | 4   | 0.18 | 0.03  | 0.13  | 0.61   | 0.17   | 0.82 | 2.19 | 1.37  |
| Désirée      | PVY      | inoculated | 5   | 0.96 | 0.05  | 0.30  | 0.17   | 0.06   | 0.13 | 0.13 | 0.15  |
| Désirée      | PVY      | inoculated | 5   | 0.26 | 0.33  | 0.17  | 0.69   | 0.33   | 0.34 | 0.39 | 1.44  |
| Désirée      | PVY      | inoculated | 5   | 0.43 | 0.24  | 0.03  | 0.31   | 0.18   | 0.49 | 0.59 | 2.16  |
| Désirée      | PVY      | inoculated | 7   | 1.21 | 1.28  | 0.14  | 1.32   | 0.80   | 0.41 | 0.73 | 2.88  |
| Désirée      | PVY      | inoculated | 7   | 1.50 | 3.02  | 1.36  | 1.24   | 1.06   | 0.18 | 0.20 | 0.99  |
| Désirée      | PVY      | inoculated | 7   | 1.29 | 0.97  | 0.21  | 0.50   | 0.34   | 0.29 | 0.26 | 1.72  |
| Désirée      | PVY      | upper      | 1   | 0.00 | 0.05  | 0.13  | 0.41   | 0.58   | 2.05 | 2.59 | 8.22  |
| Désirée      | PVY      | upper      | 1   | 0.00 | 0.03  | 0.02  | 0.10   | 0.02   | 1.11 | 1.62 | 3.71  |
| Désirée      | PVY      | upper      | 1   | 0.00 | 0.06  | 0.03  | 0.14   | 0.01   | 1.17 | 2.20 | 5.14  |
| Désirée      | PVY      | upper      | 3   | 0.00 | 0.06  | 0.13  | 0.43   | 0.08   | 0.87 | 1.72 | 2.92  |
| Désirée      | PVY      | upper      | 3   | 0.00 | 0.05  | 0.12  | 0.38   | 0.06   | 1.05 | 1.58 | 3.54  |
| Désirée      | PVY      | upper      | 3   | 0.00 | 0.09  | 0.18  | 0.30   | 0.19   | 1.00 | 1.40 | 3.76  |
| Désirée      | PVY      | upper      | 4   | 0.00 | 0.12  | 0.32  | 0.70   | 0.38   | 0.77 | 1.33 | 6.33  |
| Désirée      | PVY      | upper      | 4   | 0.00 | 0.05  | 0.21  | 0.20   | 0.06   | 0.78 | 1.51 | 2.54  |
| Désirée      | PVY      | upper      | 4   | 0.00 | 0.04  | 0.11  | 0.07   | 0.05   | 0.63 | 1.14 | 1.82  |
| Désirée      | PVY      | upper      | 5   | 0.00 | 0.10  | 0.52  | 0.54   | 0.28   | 0.35 | NA   | 0.57  |
| Désirée      | PVY      | upper      | 5   | 0.00 | 0.33  | 0.10  | 1.05   | 0.47   | 0.55 | 0.65 | 5.63  |
| Désirée      | PVY      | upper      | 5   | 0.00 | 0.12  | 0.06  | 0.65   | 0.17   | 0.60 | 0.59 | 2.54  |
| Désirée      | PVY      | upper      | 7   | 0.01 | 0.07  | 0.04  | 0.43   | 0.10   | 0.49 | 0.70 | 2.34  |
| Désirée      | PVY      | upper      | 7   | 0.00 | 0.29  | 0.04  | 0.92   | 0.32   | 0.40 | 0.62 | 12.83 |
| Désirée      | PVY      | upper      | 7   | 0.00 | 0.08  | 0.04  | 0.49   | 0.25   | 0.40 | 0.55 | 3.65  |
| Désirée      | PVY      | upper      | 8   | 0.00 | 1.46  | 0.12  | 1.50   | 0.67   | 0.31 | 0.38 | 9.62  |
| Désirée      | PVY      | upper      | 8   | 0.01 | 0.23  | 0.32  | 0.70   | 0.33   | 0.42 | 0.56 | 4.63  |
| Désirée      | PVY      | upper      | 8   | 0.00 | 0.35  | 3.74  | 0.75   | 0.77   | 0.50 | 0.52 | 3.09  |
| Désirée      | PVY      | upper      | 9   | 0.00 | 6.52  | 0.71  | 3.83   | 5.42   | 0.26 | 0.37 | 9.96  |
| Désirée      | PVY      | upper      | 9   | 0.00 | 0.54  | 0.83  | 0.79   | 0.72   | 0.40 | 0.42 | 2.88  |
| Désirée      | PVY      | upper      | 9   | 0.00 | 2.67  | 0.44  | 2.41   | 3.20   | 0.26 | 0.38 | 7.98  |
| Désirée      | PVY      | upper      | 11  | 0.00 | 1.14  | 0.87  | 0.80   | 0.78   | 0.89 | 0.91 | 3.29  |
| Désirée      | PVY      | upper      | 11  | 0.00 | 1.15  | 0.18  | 1.40   | 1.22   | 0.48 | 0.61 | 7.77  |
| Désirée      | PVY      | upper      | 11  | 0.00 | 2.63  | 0.69  | 1.26   | 1.66   | 0.69 | 0.81 | 4.19  |
| NahG-Désirée |          | upper      | 0   | 0.00 | 0.03  | 0.17  | 0.27   | 0.08   | 0.85 | 0.82 | 3.90  |
| NahG-Désirée |          | upper      | 0   | 0.00 | 0.02  | 0.05  | 0.10   | 0.03   | 0.93 | 0.92 | 2.30  |
| NahG-Désirée |          | upper      | 0   | 0.00 | 0.05  | 0.18  | 0.11   | 0.04   | 0.58 | 0.73 | 2.34  |
| NahG-Désirée |          | upper      | 0   | 0.00 | 0.03  | 0.00  | 0.05   | 0.01   | 0.87 | 1.00 | 3.01  |
| NahG-Désirée |          | upper      | 0   | 0.00 | 0.02  | 0.00  | 0.01   | 0.01   | 1.58 | 1.59 | 4.81  |
| NahG-Désirée |          | upper      | 0   | 0.00 | 0.05  | 0.02  | 0.08   | 0.02   | 1.45 | 1.82 | 4.30  |
| NahG-Désirée | MOCK     | inoculated | 1   | 0.00 | 0.12  | 0.15  | 0.05   | 0.06   | 0.82 | 0.52 | 2.52  |
| NahG-Désirée | MOCK     | inoculated | 1   | 0.00 | 0.02  | 0.07  | 0.05   | 0.03   | 0.51 | 0.30 | 0.62  |
| NahG-Désirée | MOCK     | inoculated | 1   | 0.00 | 0.32  | 0.07  | 0.12   | 0.08   | 0.99 | 0.58 | 3.40  |

| Genotype     | Inoculum | Leaf type  | dpi | PVY   | PR-1b | Glu-I | Glu-II | Glu-II | RA   | CAB4 | GBSSI |
|--------------|----------|------------|-----|-------|-------|-------|--------|--------|------|------|-------|
| NahG-Désirée | MOCK     | inoculated | 3   | 0.00  | 0.08  | 0.08  | 0.08   | 0.08   | 0.66 | 0.37 | 1.28  |
| NahG-Désirée | MOCK     | inoculated | 3   | 0.00  | 0.66  | 0.24  | 0.06   | 0.20   | 0.63 | 0.32 | 0.99  |
| NahG-Désirée | MOCK     | inoculated | 3   | 0.00  | 1.08  | 0.04  | 0.23   | 0.21   | 0.53 | 0.21 | 3.30  |
| NahG-Désirée | MOCK     | inoculated | 4   | 0.00  | 0.57  | 0.08  | 0.27   | 0.35   | 0.83 | 0.92 | 2.77  |
| NahG-Désirée | MOCK     | inoculated | 4   | 0.00  | 1.04  | 0.13  | 0.94   | 0.60   | 0.59 | 0.50 | 1.96  |
| NahG-Désirée | MOCK     | inoculated | 4   | 0.00  | 0.11  | NA    | 0.27   | 0.12   | 0.56 | 0.88 | 2.59  |
| NahG-Désirée | MOCK     | inoculated | 5   | 0.00  | 0.48  | 0.15  | 0.38   | 0.59   | 0.37 | 0.37 | 3.41  |
| NahG-Désirée | MOCK     | inoculated | 5   | 0.00  | 0.10  | 0.28  | 0.17   | 0.18   | 0.31 | 0.46 | 0.55  |
| NahG-Désirée | MOCK     | inoculated | 5   | 0.00  | 0.02  | 0.11  | 0.14   | 0.03   | 0.38 | 0.56 | 0.76  |
| NahG-Désirée | MOCK     | inoculated | 7   | 0.00  | 0.05  | 0.48  | 0.19   | 0.08   | 0.18 | 0.09 | 1.14  |
| NahG-Désirée | MOCK     | inoculated | 7   | 0.00  | 0.08  | 1.29  | 0.33   | 0.08   | 0.20 | 0.10 | 0.42  |
| NahG-Désirée | MOCK     | inoculated | 7   | 0.00  | 0.60  | 0.06  | 0.26   | 0.31   | 0.30 | 0.27 | 3.61  |
| NahG-Désirée | MOCK     | upper      | 1   | 0.00  | 0.07  | 0.00  | 0.03   | 0.01   | 1.10 | 1.08 | 3.29  |
| NahG-Désirée | MOCK     | upper      | 1   | 0.00  | 0.04  | 0.00  | 0.02   | 0.01   | 1.25 | 0.89 | 2.64  |
| NahG-Désirée | MOCK     | upper      | 1   | 0.00  | 0.04  | 0.00  | 0.03   | 0.01   | 1.33 | 1.28 | 4.51  |
| NahG-Désirée | MOCK     | upper      | 3   | 0.00  | 0.06  | 0.00  | 0.04   | 0.02   | 1.88 | 1.44 | 5.93  |
| NahG-Désirée | MOCK     | upper      | 3   | 0.00  | 0.08  | 0.01  | 0.07   | 0.05   | 1.19 | 0.98 | 3.97  |
| NahG-Désirée | MOCK     | upper      | 3   | 0.00  | 0.04  | 0.00  | 0.12   | 0.02   | 0.82 | 0.86 | 5.99  |
| NahG-Désirée | MOCK     | upper      | 4   | 0.00  | 0.04  | 0.00  | 0.01   | 0.01   | 1.29 | 1.22 | 4.84  |
| NahG-Désirée | MOCK     | upper      | 4   | 0.00  | 0.06  | 0.01  | 0.03   | 0.01   | 0.83 | 0.96 | 2.60  |
| NahG-Désirée | MOCK     | upper      | 4   | 0.00  | 0.04  | 0.01  | 0.08   | 0.02   | 0.67 | 0.83 | 3.51  |
| NahG-Désirée | MOCK     | upper      | 5   | 0.00  | 0.07  | 0.02  | 0.25   | 0.08   | 0.53 | 0.59 | 7.16  |
| NahG-Désirée | MOCK     | upper      | 5   | 0.00  | 0.03  | 0.02  | 0.04   | 0.02   | 0.92 | 1.23 | 3.13  |
| NahG-Désirée | MOCK     | upper      | 5   | 0.00  | 0.03  | 0.06  | 0.02   | 0.02   | 0.67 | 0.82 | 0.76  |
| NahG-Désirée | MOCK     | upper      | 7   | 0.00  | 0.06  | 0.06  | 0.34   | 0.12   | 0.31 | 0.53 | 4.81  |
| NahG-Désirée | MOCK     | upper      | 7   | 0.00  | 0.06  | 0.02  | 0.06   | 0.02   | 1.15 | 1.96 | 4.68  |
| NahG-Désirée | MOCK     | upper      | 7   | 0.00  | 0.07  | 0.02  | 0.24   | 0.11   | 0.58 | 0.83 | 6.63  |
| NahG-Désirée | MOCK     | upper      | 8   | 0.00  | 0.17  | 0.04  | 0.47   | 0.19   | 0.47 | 0.67 | 3.96  |
| NahG-Désirée | MOCK     | upper      | 8   | 0.00  | 0.02  | 0.01  | 0.07   | 0.03   | 0.64 | 0.53 | 1.95  |
| NahG-Désirée | MOCK     | upper      | 8   | 0.00  | 0.03  | 0.09  | 0.17   | 0.08   | 0.44 | 0.44 | 0.64  |
| NahG-Désirée | MOCK     | upper      | 9   | 0.00  | 0.10  | 0.02  | 0.59   | 0.12   | 0.44 | 0.61 | 8.67  |
| NahG-Désirée | MOCK     | upper      | 9   | 0.00  | 0.09  | 0.05  | 0.33   | 0.11   | 0.30 | 0.44 | 8.05  |
| NahG-Désirée | MOCK     | upper      | 9   | 0.00  | 0.07  | 0.04  | 0.30   | 0.08   | 0.35 | 0.42 | 3.04  |
| NahG-Désirée | MOCK     | upper      | 11  | 0.00  | 0.04  | 0.02  | 0.38   | 0.10   | 0.57 | 0.78 | 2.79  |
| NahG-Désirée | MOCK     | upper      | 11  | 0.00  | 0.04  | 0.01  | 0.22   | 0.08   | 0.30 | 0.44 | 1.22  |
| NahG-Désirée | MOCK     | upper      | 11  | 0.00  | 0.03  | 0.01  | 0.18   | 0.05   | 0.78 | 0.93 | 3.20  |
| NahG-Désirée | PVY      | inoculated | 1   | 0.47  | NA    | 4.57  | 0.03   | 0.04   | 0.31 | 0.40 | 0.16  |
| NahG-Désirée | PVY      | inoculated | 1   | 1.02  | 0.05  | 1.35  | 0.10   | 0.07   | 0.25 | 0.40 | 0.57  |
| NahG-Désirée | PVY      | inoculated | 1   | 0.26  | 0.03  | 0.55  | 0.09   | 0.05   | 0.71 | 1.01 | 1.02  |
| NahG-Désirée | PVY      | inoculated | 3   | 0.54  | 0.29  | 0.41  | 0.97   | 0.19   | 0.44 | 0.22 | 0.84  |
| NahG-Désirée | PVY      | inoculated | 3   | 0.67  | 0.09  | 0.13  | 0.55   | 0.07   | 0.37 | 0.33 | 1.15  |
| NahG-Désirée | PVY      | inoculated | 3   | 0.40  | 0.09  | 0.11  | 0.36   | 0.13   | 0.58 | 0.51 | 2.48  |
| NahG-Désirée | PVY      | inoculated | 4   | NA    | 0.28  | 0.43  | 0.12   | 0.49   | 0.37 | 0.63 | 1.10  |
| NahG-Désirée | PVY      | inoculated | 4   | 4.51  | 0.69  | 0.17  | 0.15   | 0.39   | 0.37 | 0.57 | 0.70  |
| NahG-Désirée | PVY      | inoculated | 4   | 2.17  | 1.05  | 1.88  | 0.41   | 1.25   | 0.30 | 0.29 | 0.62  |
| NahG-Désirée | PVY      | inoculated | 5   | 4.59  | 12.46 | 1.57  | 1.43   | 3.35   | 0.33 | 0.32 | 2.07  |
| NahG-Désirée | PVY      | inoculated | 5   | 1.19  | NA    | 0.52  | 0.36   | 0.93   | 0.46 | 0.58 | 1.04  |
| NahG-Désirée | PVY      | inoculated | 5   | 3.88  | 5.02  | 0.52  | 0.79   | 2.28   | 0.65 | 0.76 | 1.82  |
| NahG-Désirée | PVY      | inoculated | 7   | 8.93  | 13.14 | 4.62  | 2.16   | 5.38   | 0.74 | 0.53 | 1.54  |
| NahG-Désirée | PVY      | inoculated | 7   | 15.49 | 4.99  | 2.74  | 2.77   | 1.37   | 0.04 | 0.03 | 0.10  |

| <b>Genotype</b> | <b>Inoculum</b> | <b>Leaf type</b> | <b>dpi</b> | <b>PVY</b> | <b>PR-1b</b> | <b>Glu-I</b> | <b>Glu-II</b> | <b>Glu-II</b> | <b>RA</b> | <b>CAB4</b> | <b>GBSSI</b> |
|-----------------|-----------------|------------------|------------|------------|--------------|--------------|---------------|---------------|-----------|-------------|--------------|
| NahG-Désirée    | PVY             | inoculated       | 7          | 6.43       | 10.78        | 6.57         | 4.94          | 4.26          | 0.21      | 0.24        | 2.31         |
| NahG-Désirée    | PVY             | upper            | 1          | 0.00       | 0.16         | 0.01         | 0.07          | 0.01          | NA        | 2.02        | 1.83         |
| NahG-Désirée    | PVY             | upper            | 1          | 0.00       | 0.04         | 0.03         | 0.09          | 0.02          | 0.83      | 1.23        | 2.39         |
| NahG-Désirée    | PVY             | upper            | 1          | 0.00       | 0.02         | 0.04         | 0.01          | 0.01          | 0.90      | 1.44        | 1.06         |
| NahG-Désirée    | PVY             | upper            | 3          | 0.00       | 0.03         | 0.01         | 0.03          | 0.02          | 0.64      | 1.49        | 1.27         |
| NahG-Désirée    | PVY             | upper            | 3          | 0.00       | 0.03         | 0.04         | 0.06          | 0.02          | 1.01      | 1.79        | 2.34         |
| NahG-Désirée    | PVY             | upper            | 3          | 0.00       | 0.18         | 0.04         | 0.27          | 0.33          | 0.81      | 1.79        | 2.51         |
| NahG-Désirée    | PVY             | upper            | 4          | 0.00       | 0.03         | 0.01         | 0.01          | 0.01          | 0.61      | 1.41        | 2.75         |
| NahG-Désirée    | PVY             | upper            | 4          | 0.00       | 0.10         | 0.03         | 0.02          | 0.02          | 0.92      | 1.54        | 1.68         |
| NahG-Désirée    | PVY             | upper            | 4          | 0.00       | 0.04         | 0.03         | 0.03          | 0.03          | 0.67      | 1.20        | 1.90         |
| NahG-Désirée    | PVY             | upper            | 5          | 0.00       | 0.06         | 0.02         | 0.10          | 0.04          | 0.80      | NA          | 7.84         |
| NahG-Désirée    | PVY             | upper            | 5          | 0.00       | 0.07         | 0.00         | 0.04          | 0.02          | 1.07      | 1.25        | 4.01         |
| NahG-Désirée    | PVY             | upper            | 5          | 0.00       | 0.13         | 0.02         | 0.02          | 0.02          | 1.60      | 1.79        | 5.36         |
| NahG-Désirée    | PVY             | upper            | 7          | 0.00       | 0.02         | 0.07         | 0.10          | 0.08          | 0.63      | 1.12        | 4.44         |
| NahG-Désirée    | PVY             | upper            | 7          | 0.00       | 0.02         | 0.04         | 0.04          | 0.02          | 0.69      | 1.40        | 2.39         |
| NahG-Désirée    | PVY             | upper            | 7          | 0.00       | 0.11         | 0.08         | 0.43          | 0.16          | 0.60      | 1.12        | 5.94         |
| NahG-Désirée    | PVY             | upper            | 8          | 0.00       | 0.05         | 0.08         | 0.27          | 0.12          | 0.55      | 0.76        | 6.92         |
| NahG-Désirée    | PVY             | upper            | 8          | 0.00       | 0.05         | 0.07         | 0.45          | 0.15          | 0.47      | 0.75        | 8.16         |
| NahG-Désirée    | PVY             | upper            | 8          | 0.00       | 0.03         | 0.02         | 0.11          | 0.05          | 0.51      | 0.95        | 4.32         |
| NahG-Désirée    | PVY             | upper            | 9          | 0.31       | 0.10         | 0.28         | 0.32          | 0.15          | 0.58      | 0.99        | 6.81         |
| NahG-Désirée    | PVY             | upper            | 9          | 0.00       | 0.20         | 1.05         | 0.59          | 0.39          | 0.84      | 1.07        | 5.91         |
| NahG-Désirée    | PVY             | upper            | 9          | 0.00       | 0.14         | 0.41         | 0.53          | 0.30          | 0.51      | 0.76        | 8.64         |
| NahG-Désirée    | PVY             | upper            | 11         | 0.00       | 0.07         | 0.06         | 0.34          | 0.14          | 0.73      | 0.73        | 3.09         |
| NahG-Désirée    | PVY             | upper            | 11         | 1.29       | 1.80         | 0.25         | 2.27          | 1.75          | 0.66      | 1.07        | 1.97         |
| NahG-Désirée    | PVY             | upper            | 11         | 0.00       | 0.07         | 0.09         | 0.41          | 0.17          | 0.51      | 0.74        | 4.20         |
